# Supplementary material
Source: ML conference proceedings conference paper supplement (https://proceedings.neurips.cc/paper_files/paper/2007/hash/846c260d715e5b854ffad5f70a516c88-Abstract.html)
Supplement: Supplementary file [file 846c260d715e5b854ffad5f70a516c88-Supplemental.zip]

# Subspace-Based Face Recognition in Analog VLSI (W77)

Gonzalo Carvajal, Waldo Valenzuela, and Miguel Figueroa

Dimensionality reduction using  
PCA and LDA

Manhattan distances

12x12 images, 39 projections

ORL database

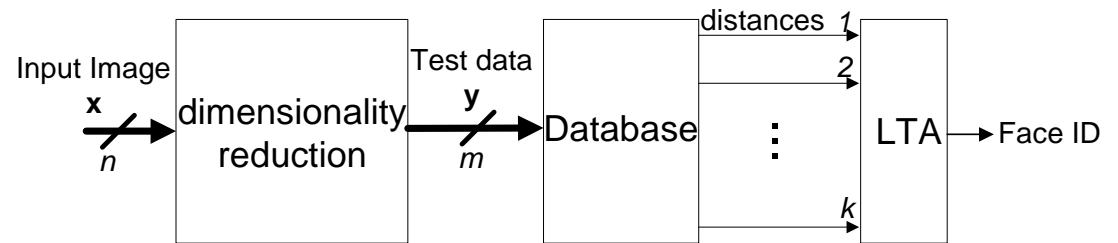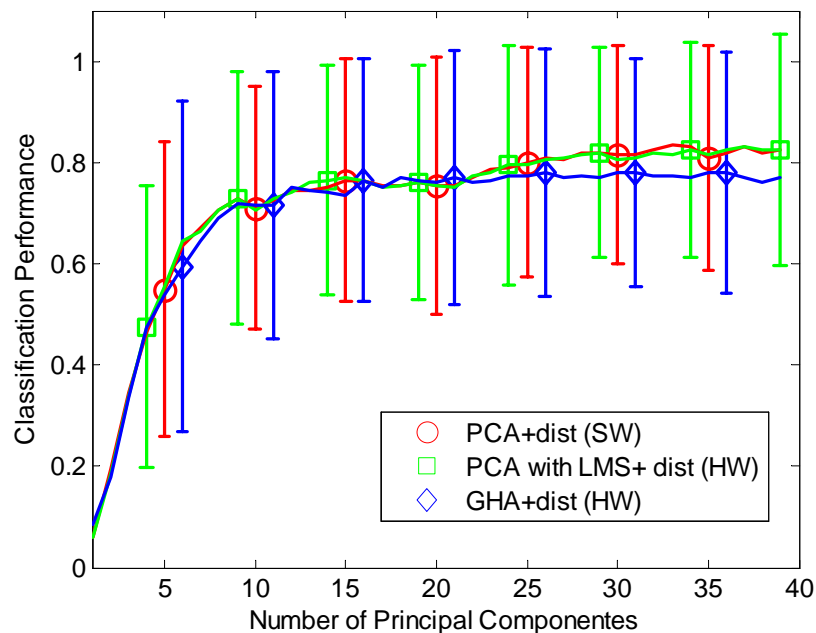

83% using PCA (software: 84%)

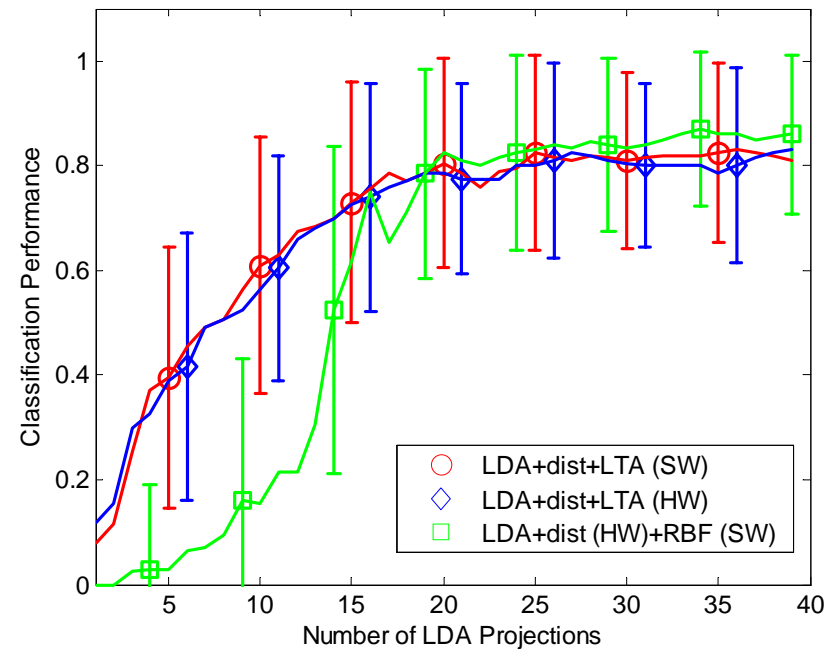

85% using LDA (software: 87%)
